# Supplementary material
Source: PubMed Central journal article supplement (PMC11100852)
Supplement: media-1.pdf [file media-1.pdf]

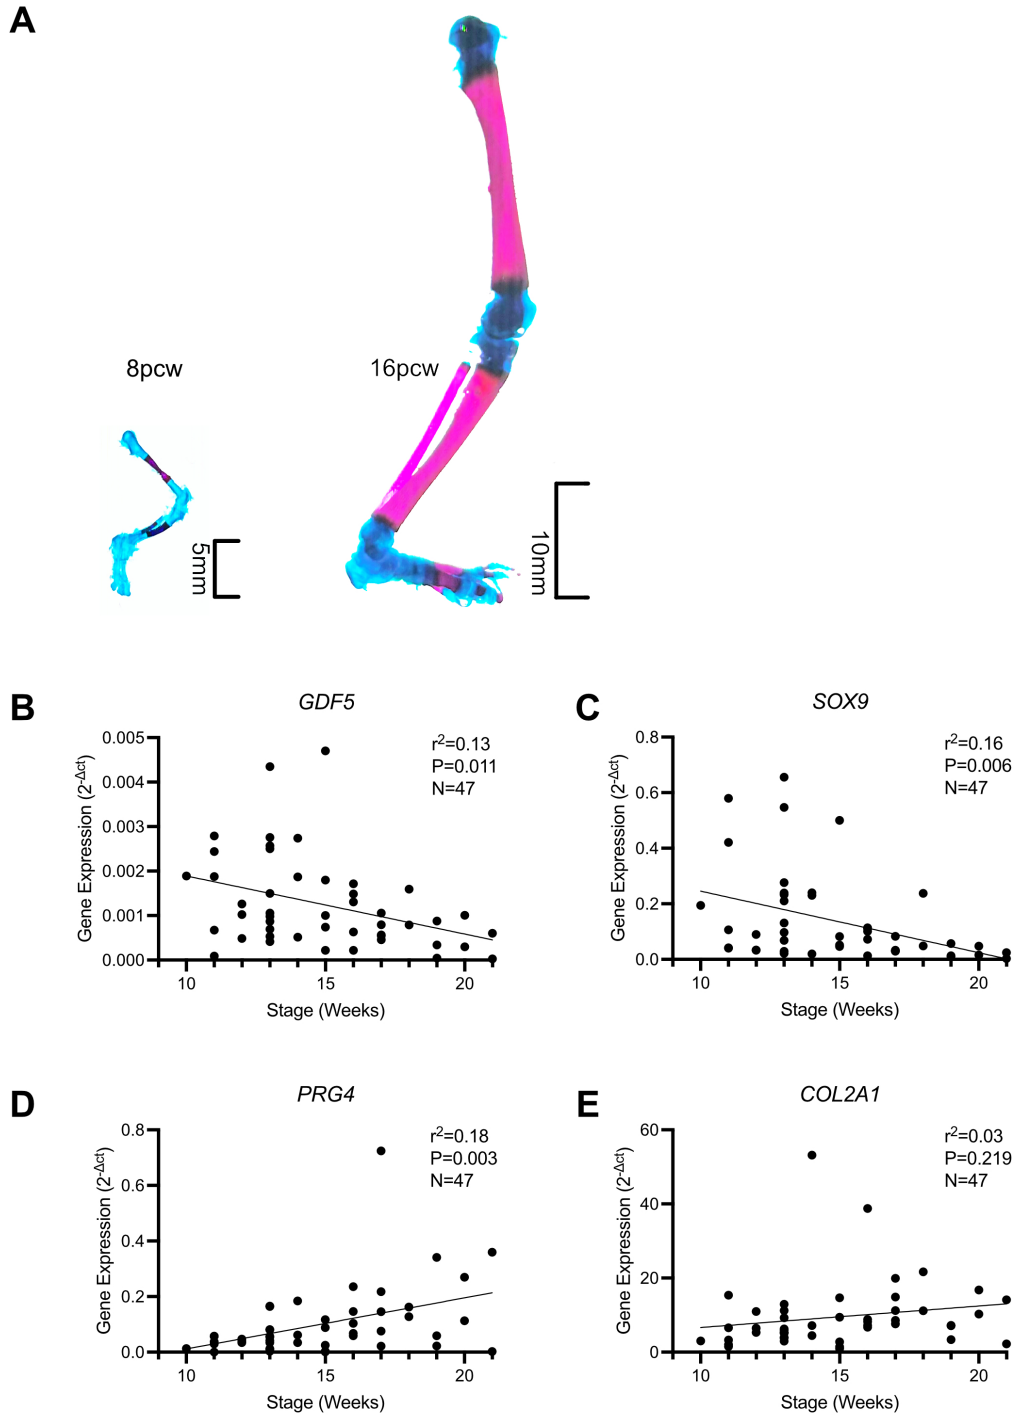

**Supplementary Figure 1. Characterisation of the human knee cartilage samples.** **A**, Alician blue and alizarin red staining of human foetal femur at 8pcw (left) and 16 pcw (right). **B-E**, Gene expression of cartilage progenitor (*GDF5* and *SOX9*) and chondrocyte (*PRG4* and *COL2A1*) makers in the samples. Simple linear regression was performed by the developmental stage.



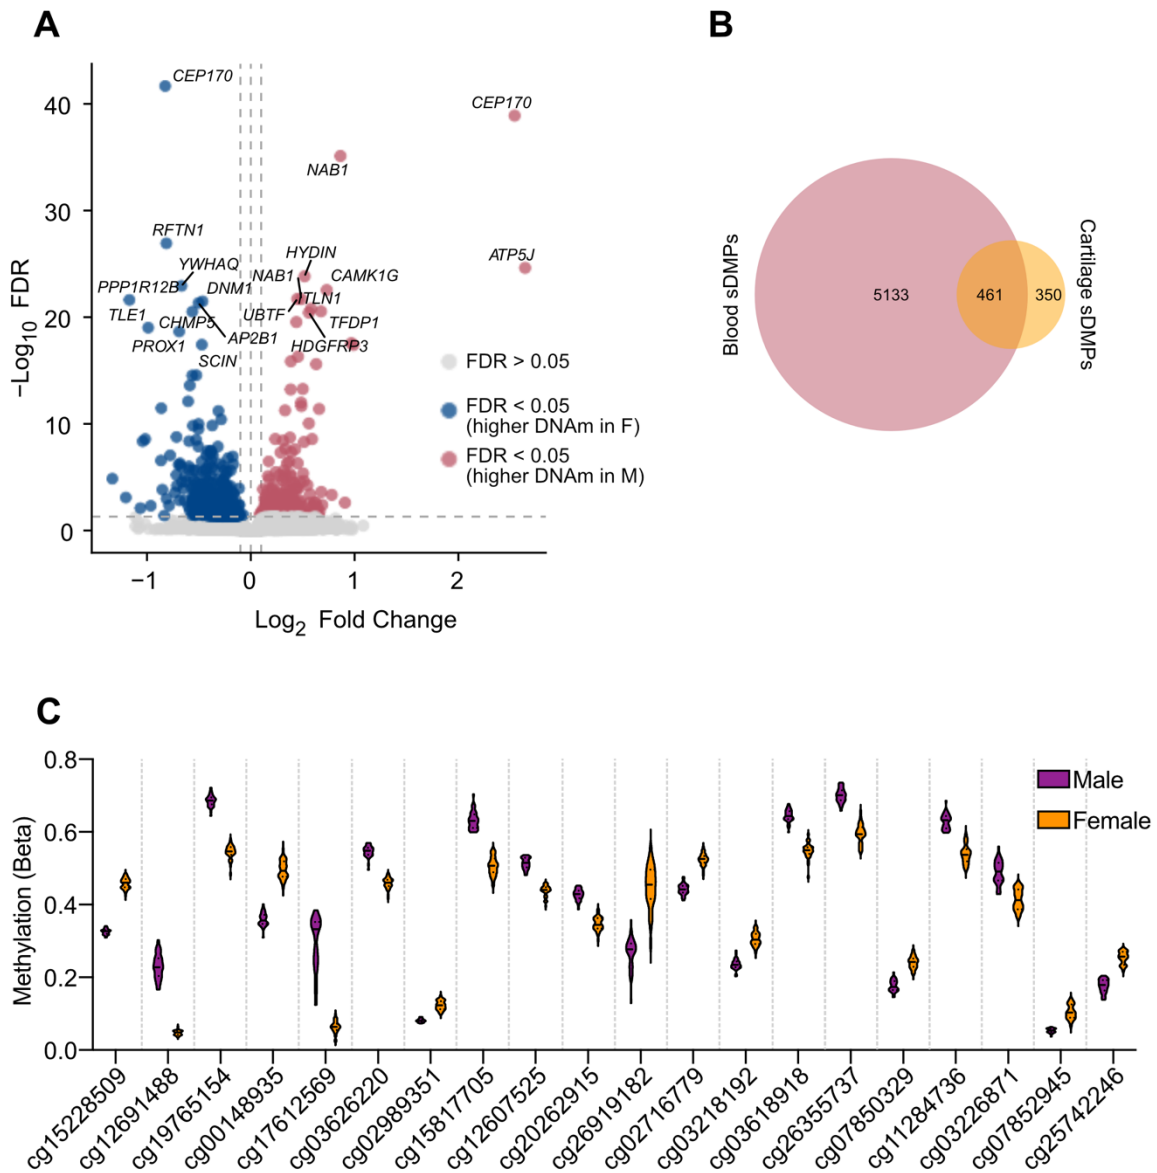

**Supplementary Figure 3. Sexual dimorphism in DNA methylation within human developmental cartilage.** **A**, Volcano plot of sDMPs. Grey, non-significant sDMPs (FDR adjusted P-value ( $P_{\text{adj}}$ ) < 0.05); Blue, significant sDMPs with higher methylation in female (F) samples ( $P_{\text{adj}}$  < 0.05); Red, significant sDMPs with higher methylation in male (M) samples ( $P_{\text{adj}}$  < 0.05). **B**, Venn diagram of overlap between sDMPs in neonatal blood reported in Santos *et al.* (pink) and foetal cartilage (orange). **C**, Methylation beta values in human foetal cartilage samples at the most significant sDMP CpGs. Purple, male; orange, female.

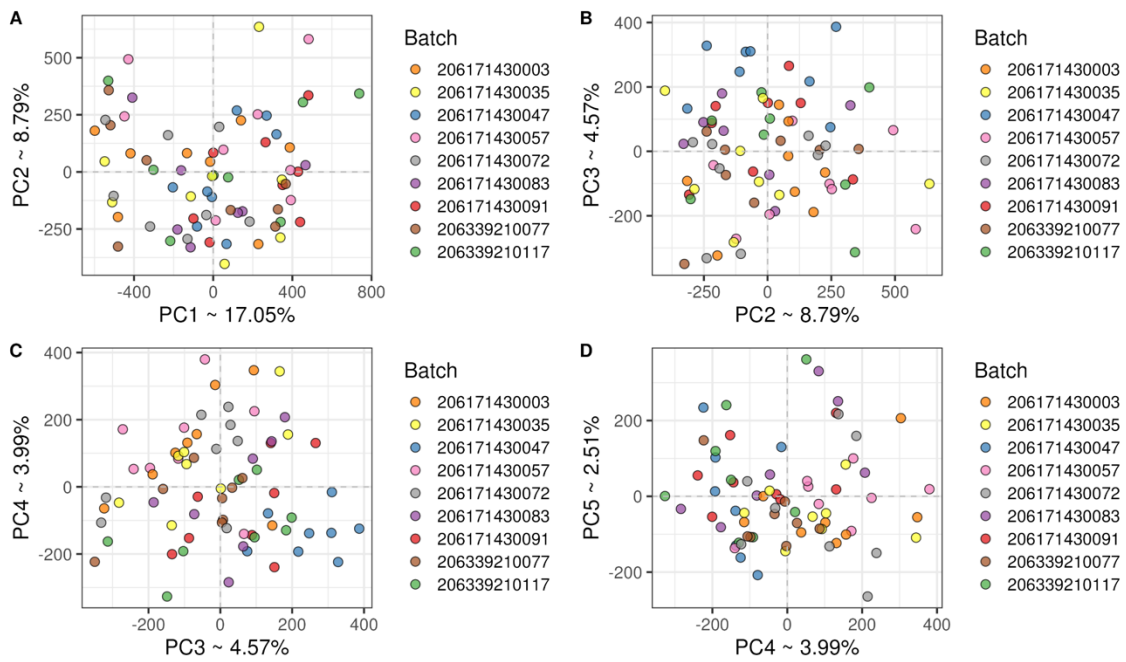

**Supplementary Figure 4. Assessment of batch effects by principal component analysis of the 71 foetal cartilage samples used in this study.** Principal component analysis of normalised DNAm samples coloured by Sentrax ID shows evidence of weak batch effects, observable in-association with PC3 and PC4.

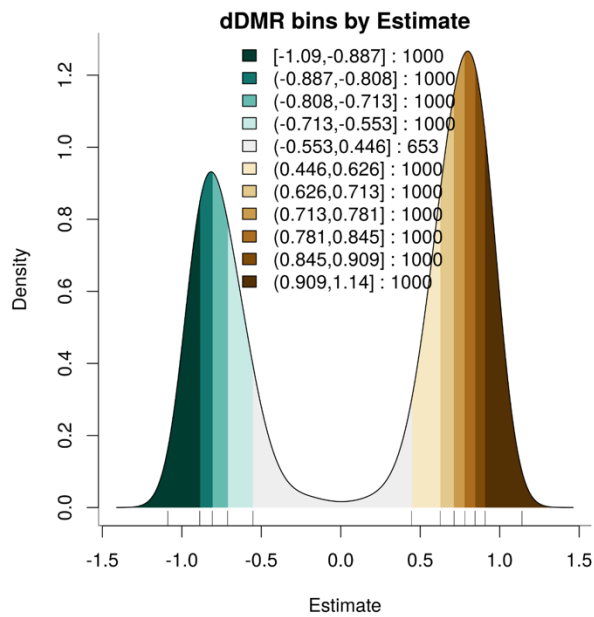

**Supplementary Figure 5. Developmental differentially methylated region (dDMR) bins for transcription factor motif analysis.** Histogram of the equally sized groups of developmental DMRs binned by Estimate (log<sub>2</sub> fold change) that were used for transcription factor motif analysis with monaLisa.
